# Supplementary material for: Development of Gateway Binary Vector Series with Four Different Selection Markers for the Liverwort Marchantia polymorpha
Source: PubMed Central journal article supplement (PMC4583185; doi:10.1371/journal.pone.0138876), 2015-09-25
Supplement: pone.0138876.s002.pdf [file pone.0138876.s002.pdf]

### pMpGWB100

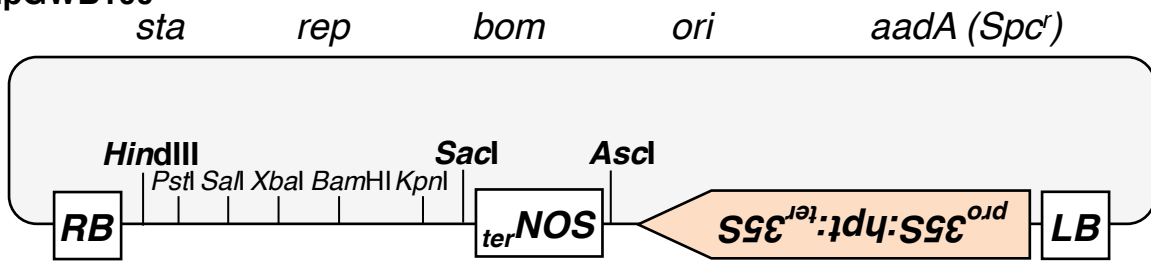

Selection for bacteria: Spectinomycin (100 mg / L)  
Selection for plant: Hygromycin (10 mg / L)

### pMpGWB200

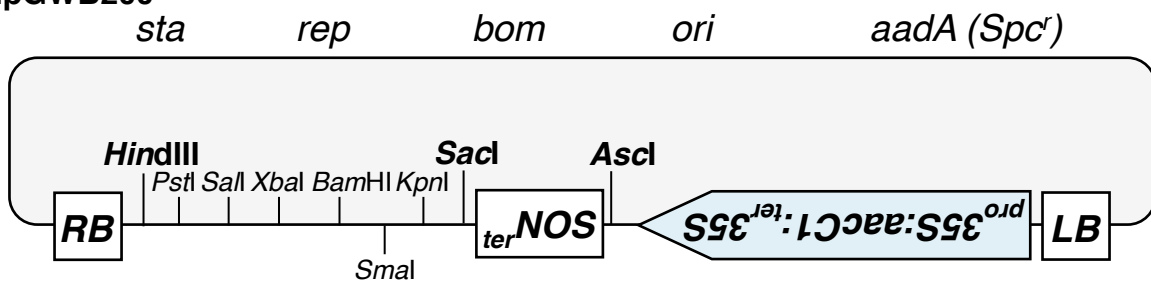

Selection for bacteria: Spectinomycin (100 mg / L)  
Selection for plant: Gentamycin (100 mg / L)

### pMpGWB300

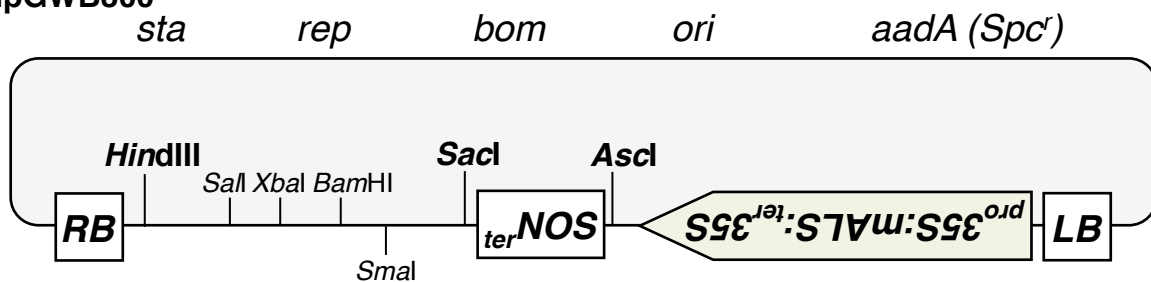

Selection for bacteria: Spectinomycin (100 mg / L)  
Selection for plant: Chlorsulfuron (0.5  $\mu$ M)

### pMpGWB400

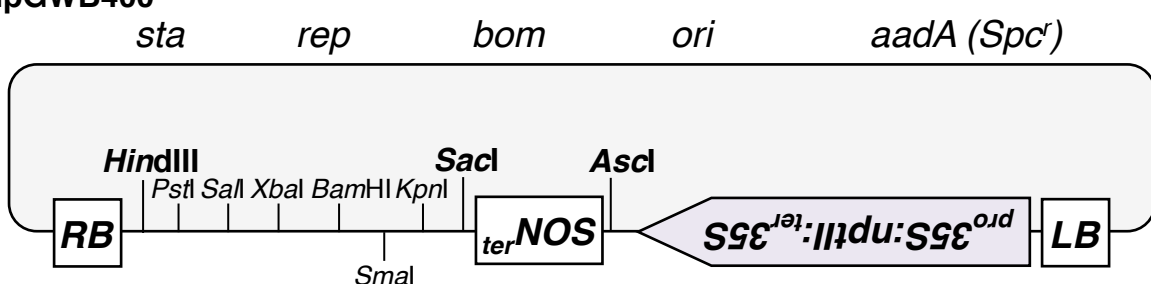

Selection for bacteria: Spectinomycin (100 mg / L)  
Selection for plant: G418 (5 mg / L)

## S2 Fig. Schematic illustration of pMpGWB vector backbones.

Restriction enzyme sites available for linearization of respective plasmids are indicated. *RB*, right border; *LB*, left border; *sta*, region conferring stability in *Agrobacterium*; *rep*, broad host-range replication origin; *bom*, *cis*-acting element for conjugational transfer; *ori*, ColE1 replication origin. *aadA*, spectinomycin-resistance marker (*Spc<sup>r</sup>*) used for bacterial selection.
